# Supplementary material for: Coxsackievirus A10 atomic structure facilitating the discovery of a broad-spectrum inhibitor against human enteroviruses
Source: PubMed Central journal article supplement (PMC6331555; doi:10.1038/s41421-018-0073-7), 2019-01-15
Supplement: 41421_2018_73_MOESM1_ESM.pdf [file 41421_2018_73_MOESM1_ESM.pdf]

## Supplementary Information

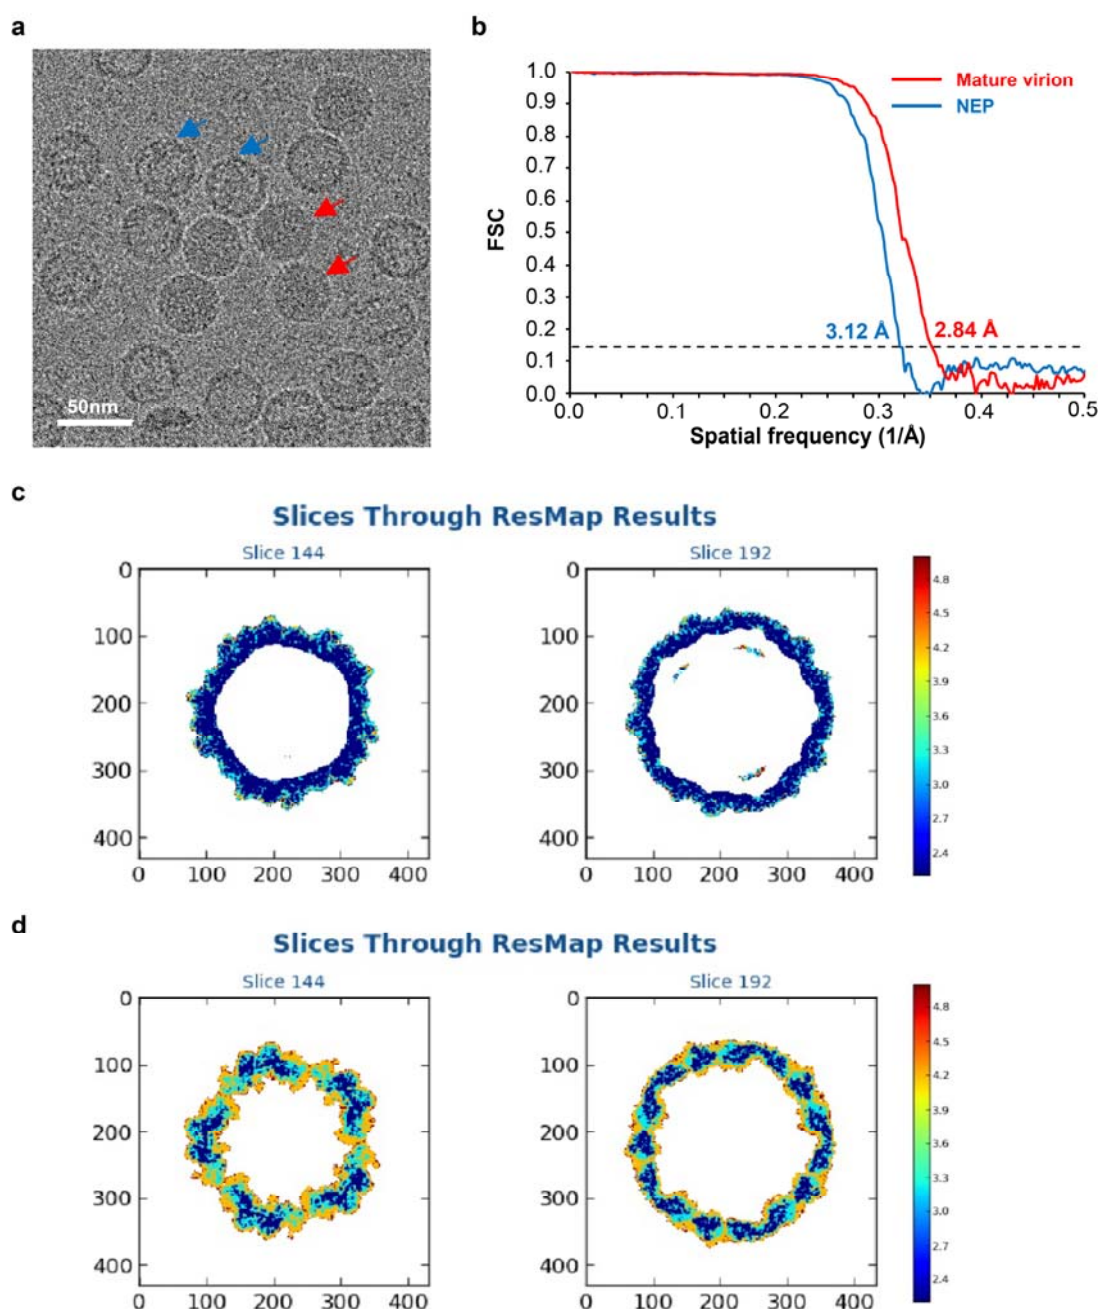

**Supplementary Fig. S1.** Cryo-EM image of CV-A10 and resolution evaluation of the cryo-EM map. **(a)** A representative cryo-EM image of CV-A10. The red and blue arrows indicate mature virion and NEP, respectively. Bar = 50 nm. **(b)** Resolution assessment of our two cryo-EM maps (CV-A10 mature virion and NEP) by Fourier shell correlation (FSC) at 0.143 criterion. **(c, d)** Local resolution evaluation of the CV-A10 mature virion **(c)** and NEP particle **(d)** maps estimated by Resmap. For each map, two representative discrete 2D slices were shown. The color bar on the right labels the corresponding resolution (unit is Å).

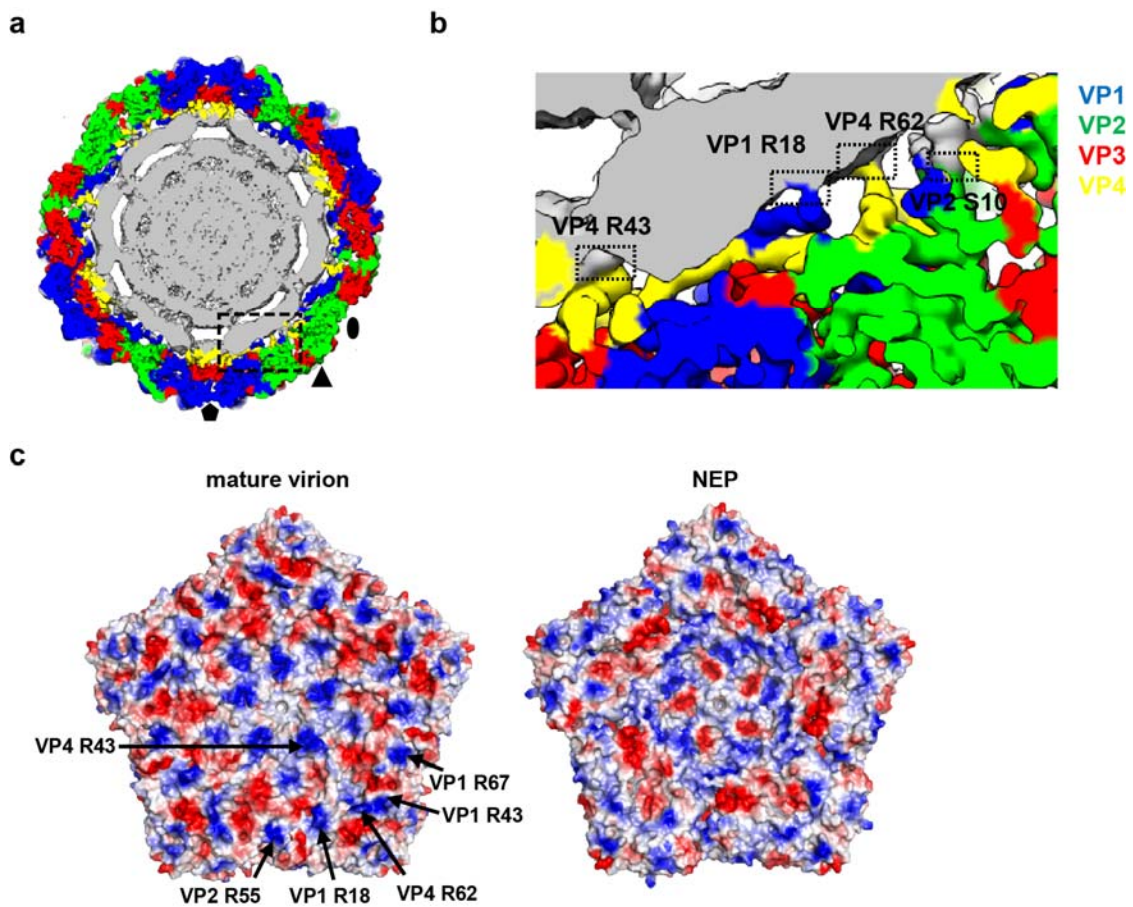

**Supplementary Fig. S2.** Genomic RNA interaction with CV-A10 capsid. **(a)** A central slice through the CV-A10 mature virion map, which was low-pass filtered to 5 Å resolution and viewed along the 2-fold axis. RNA is colored in gray. Black oval, triangle, and pentagon represent the 2-fold, 3-fold, and 5-fold axes, respectively, which style was followed throughout. **(b)** Close-up view of viral RNA–protein interaction interface, with the major bridges formed between viral RNA and protein capsid highlighted by dash line rectangles. **(c)** Electrostatic surface of a pentamer of CV-A10 mature virion and NEP, visualized from outside of the capsid. Positively charged amino acids were colored in blue, while negatively charged amino acids in red. The major amino acids contributing to the positive charges are indicated in CV-A10 mature virion.

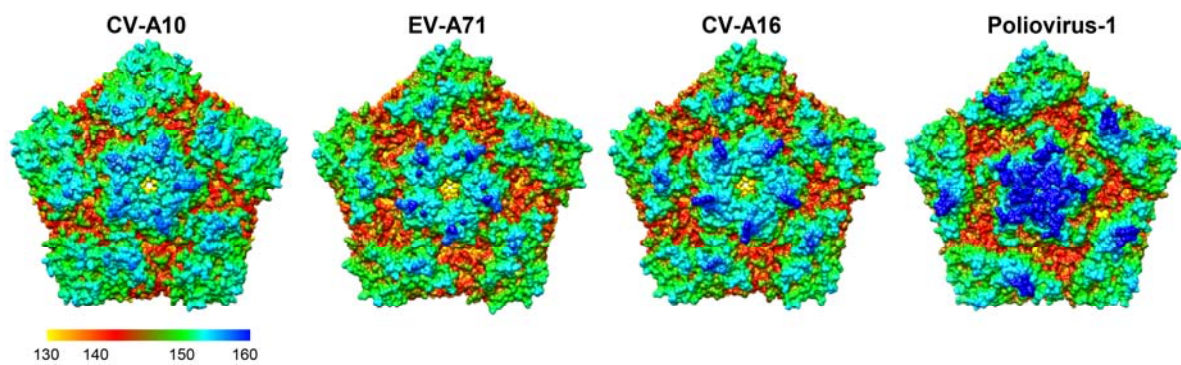

**Supplementary Fig. S3.** Molecular surfaces of pentamers from several enteroviruses. Radially colored molecular surfaces of one pentamer from CV-A10 mature virion, EV-A71(3VBF), CV-A16 (5C4W), and PV-1(1VBD), respectively.

**VP1**

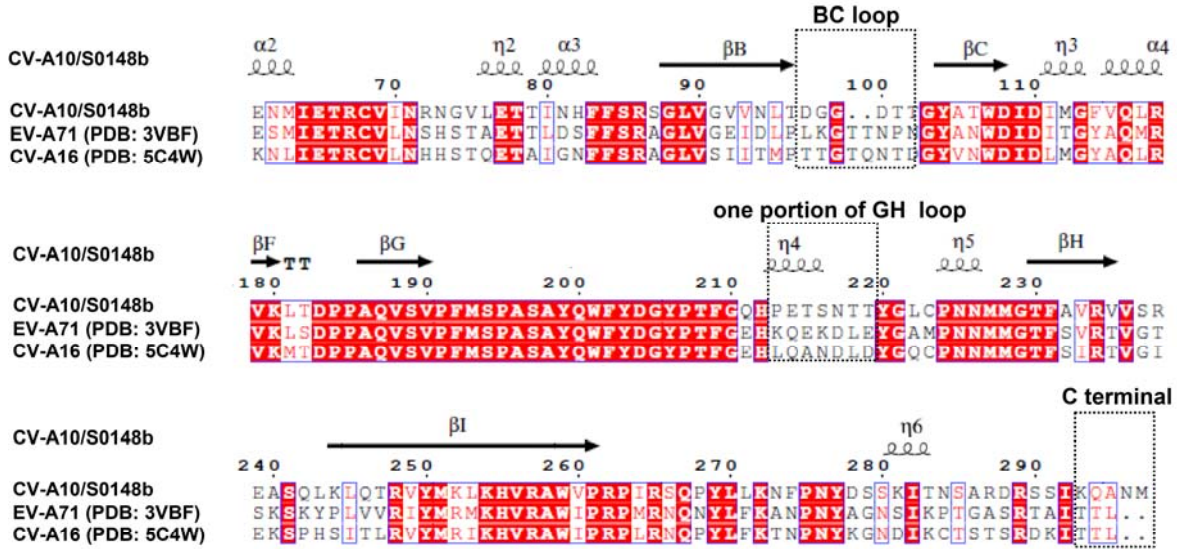

**VP2**

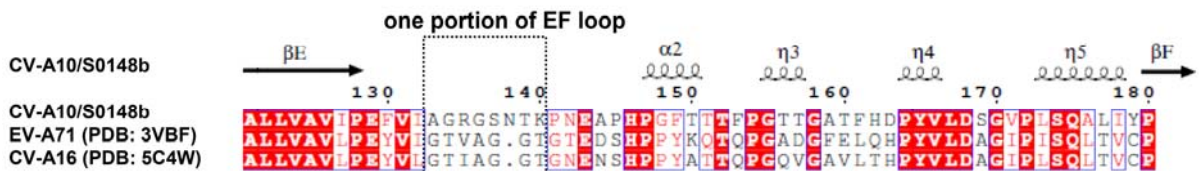

**VP3**

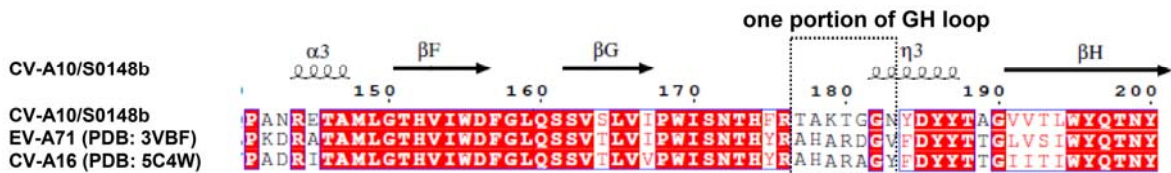

**Supplementary Fig. S4.** Sequence alignment of several loops around the canyon of CV-A10, EV-A71, and CV-A16. Esript representation of a structure-based sequence alignment of several fragments of CV-A10 (strain S0148b) VP1, VP2, and VP3 with that of EV-A71 (PDB 3VBF) and CV-A16 (PDB 5C4W), respectively. The sequence alignment indicates the sequence variations in the VP1 BC loop, VP1 GH loop, VP1 C terminal, VP2 EF loop, and VP3 GH loop among these three strains. The secondary structural elements for CV-A10 are also shown at top.



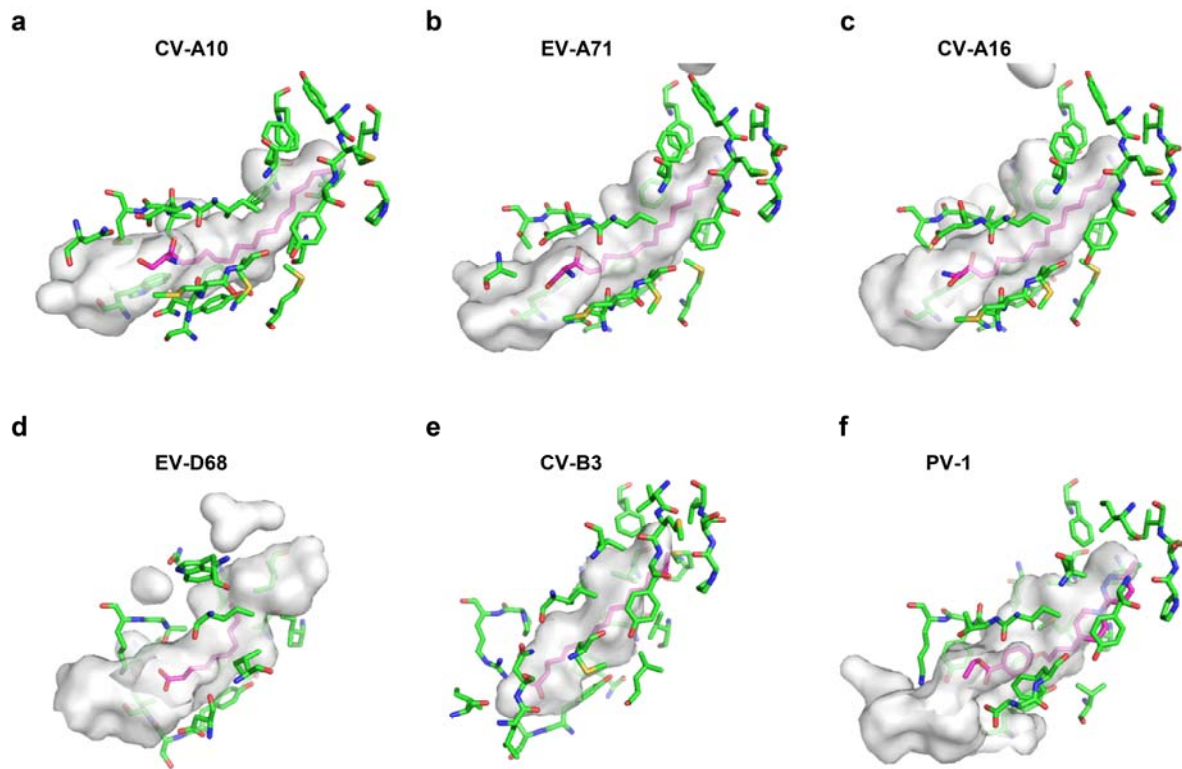

**Supplementary Fig. S5.** VP1 pocket regions of CV-A10, EV-A71, CV-A16, EV-D68, CV-B3, and PV-1. **(a-f)** VP1 pocket regions of CV-A10 **(a)**, EV-A71 **(b)**, CV-A16 **(c)**, EV-D68 **(d)**, CV-B3 **(e)**, and PV-1 **(f)**. VP1 pocket regions of these six viruses are shown as transparent surface, with six pocket factors colored by elements (Oxygen, nitrogen, and carbon in red, dark blue, and magenta, respectively). The VP1 residues (colored by residues) within a distance of 4.0 Å from any atom of the corresponding pocket factor are also shown in every panel.

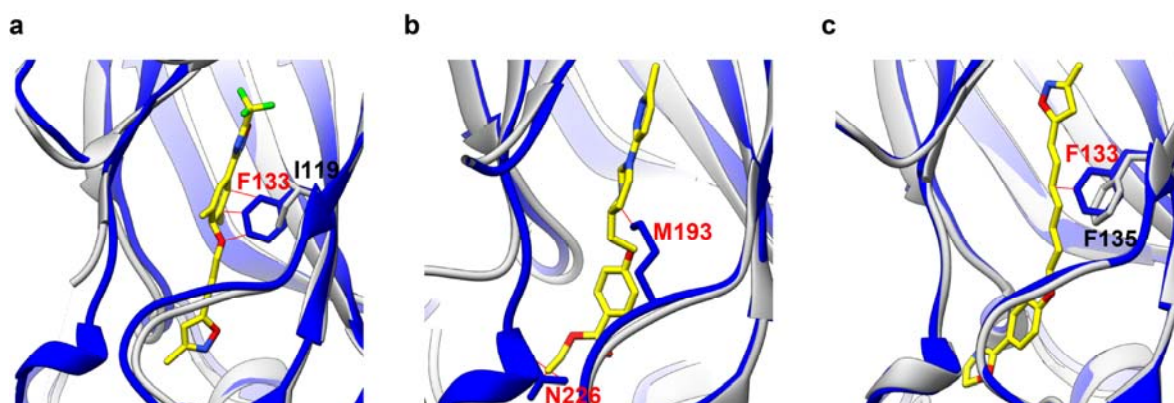

**Supplementary Fig. S6.** The VP1 pocket of CV-A10 is unsuitable for binding with pleconaril, pirodavir, and WIN51711. **(a)** Superposition of the VP1 pocket regions in CV-A10 (blue) and EV-D68 complexed with pleconaril (PDB: 4WM7, gray). The pleconaril is shown as sticks and colored by elements. Shown also are the residue F133 in CV-A10. Red lines indicate a distance closer than  $2.4 \text{ \AA}$  between a given atom of CV-A10 (blue) and a given atom of pleconaril. The rendering style was followed throughout. **(b)** Superposition of the VP1 pocket regions in CV-A10 (blue) and poliovirus-3 complexed with pirodavir (PDB: 1VBC, gray). Shown also are the residues N226 and M193 in CV-A10. **(c)** Superposition of the VP1 pocket regions in CV-A10 (blue) and EV-A71 complexed with WIN51711 (PDB: 3ZFG, gray). Shown also are the residues F133 of CV-A10 and F135 of EV-A71, which adopt different conformations.

**Supplementary Table S1. Cryo-EM data collection and refinement statistics**

|                                                 | <b>CV-A10 mature virion</b> | <b>CV-A10 NEP</b> |
|-------------------------------------------------|-----------------------------|-------------------|
| <b>Data collection</b>                          |                             |                   |
| EM equipment                                    | Titan Krios                 | Titan Krios       |
| Voltage(kV)                                     | 300                         | 300               |
| Detector                                        | K2 Summit                   | K2 Summit         |
| Pixel size (Å)*                                 | 0.67                        | 0.67              |
| Electron dose (e <sup>-</sup> /Å <sup>2</sup> ) | 38                          | 38                |
| Exposure time (s)                               | 7.6                         | 7.6               |
| Frames                                          | 38                          | 38                |
| Defocus range (µm)                              | -0.6 to -2.0                | -0.6 to -2.0      |
| <b>Reconstruction</b>                           |                             |                   |
| Software                                        | jspr                        | jspr              |
| Raw micrographs                                 | 2,303                       | 2,303             |
| Final particles                                 | 13,273                      | 23,312            |
| Final resolution (Å)                            | 2.84                        | 3.12              |
| Map-sharpening B factor (Å <sup>2</sup> )       | -109.4                      | -125.6            |
| <b>Atomic modeling</b>                          |                             |                   |
| Software                                        | Phenix & COOT               | Phenix & COOT     |
| RMSD                                            |                             |                   |
| Bond length                                     | 0.009                       | 0.010             |
| Bond angle                                      | 1.20                        | 1.23              |
| Ramachandran plot (%)                           |                             |                   |
| favored                                         | 94.45                       | 92.55             |
| allowed                                         | 5.18                        | 7.15              |
| outliers                                        | 0.37                        | 0.30              |
| Rotamer outliers (%)                            | 0.0                         | 0.0               |

\*Pixel size in superresolution mode. The physical pixel size is 1.34 Å per pixel.

**Supplementary Table S2. Protein-protein interactions in mature virion and NEP of CV-A10**

| Interface                                       | Interface area (Å <sup>2</sup> ) |            |
|-------------------------------------------------|----------------------------------|------------|
|                                                 | CV-A10 mature virion             | CV-A10 NEP |
| Interface within protomer                       |                                  |            |
| VP1/VP2                                         | 2237.8                           | 1711.5     |
| VP1/VP3                                         | 3556.5                           | 2876.8     |
| VP2/VP3                                         | 1582.3                           | 1565.4     |
| Interface between protomers but within pentamer |                                  |            |
| VP1/VP1                                         | 839                              | 755        |
| VP1/VP2                                         | 436                              | 0          |
| VP1/VP3                                         | 1563                             | 1189       |
| VP2/VP3                                         | 684                              | 313        |
| VP3/VP3                                         | 791                              | 677        |
| Interface between pentamers                     |                                  |            |
| VP1/VP1                                         | 775                              | 0          |
| VP1/VP2                                         | 1456                             | 6          |
| VP2/VP2                                         | 534                              | 108        |
| VP2/VP3                                         | 2336                             | 2183       |
| VP3/VP3                                         | 79                               | 48         |



**Supplementary Table S3. Comparison of residues lining the VP1 hydrophobic pockets of CV-A10, EV-A71, CV-A16, EV-D68, CV-B3, and PV-1**

| CV-A10                                 | EV-A71<br>(3VBF) | CV-A16<br>(5C4W) | EV-D68<br>(4WM8) | CV-B3<br>(1COV) | PV-1<br>(1VBD) |
|----------------------------------------|------------------|------------------|------------------|-----------------|----------------|
| <b>Entrance and head of the pocket</b> |                  |                  |                  |                 |                |
| 110 Asp                                | 112 Asp          | 112 Asp          | 96 Asn           | 93 Thr          | 111 Thr        |
| 111 Ile                                | 113 Ile          | 113 Leu          | 97 Thr           | 94 Pro          | 112 Tyr        |
| 112 Met                                | 114 Thr          | 114 Met          | 98 Lys           | 95 Arg          | 113 Lys        |
| 129 Phe                                | 131 Phe          | 131 Phe          | 115 Phe          | 112 Phe         | 130 Phe        |
| 199 Tyr                                | 201 Tyr          | 201 Tyr          | 193 Tyr          | 189 Tyr         | 205 Tyr        |
| 201 Trp                                | 203 Trp          | 203 Trp          | 195 Val          | 191 Asn         | 207 His        |
| 223 Cys                                | 225 Met          | 225 Cys          | 212 Asn          | 209 Thr         | 232 Ala        |
| 225 Asn                                | 227 Asn          | 227 Asn          | 214 Ala          | 210 Leu         | 233 Ser        |
| 226 Asn                                | 228 Asn          | 228 Asn          | 215 Asp          | 211 Asn         | 235 Asn        |
| 227 Met                                | 229 Met          | 229 Met          | 216 Thr          | 212 Asn         | 236 Asp        |
| 273 Lys                                | 274 Lys          | 274 Lys          | 262 Ile          | 259 Lys         | 282 Pro        |
| <b>Middle part of the pocket</b>       |                  |                  |                  |                 |                |
| 90 Val                                 | 90 Val           | 90 Val           | 69 Val           | 74 Val          | 87 Val         |
| 108 Asp                                | 110 Asp          | 110 Asp          | 94 Thr           | 91 Val          | 109 Lys        |
| 109 Ile                                | 111 Ile          | 111 Ile          | 95 Ile           | 92 Ile          | 110 Ile        |
| 131 Ala                                | 133 Ala          | 133 Ala          | 117 Ala          | 114 Leu         | 132 Met        |
| 133 Phe                                | 135 Phe          | 135 Phe          | 119 Ile          | 116 Leu         | 134 Leu        |
| 190 Val                                | 192 Val          | 192 Val          | 184 Ile          | 180 Val         | 196 Val        |
| 193 Met                                | 195 Met          | 195 Met          | 187 Met          | 183 Leu         | 199 Val        |
| 228 Met                                | 230 Met          | 230 Met          | 217 Ile          | 213 Met         | 237 Phe        |
| 251 Met                                | 253 Met          | 253 Met          | 241 Met          | 237 Phe         | 261 Leu        |
| <b>End of the pocket</b>               |                  |                  |                  |                 |                |
| 107 Trp                                | 109 Thr          | 109 Trp          | 93 Trp           | 90 Trp          | 108 Trp        |
| 135 Phe                                | 137 Phe          | 137 Phe          | 121 Ile          | 118 Phe         | 136 Phe        |
| 153 Tyr                                | 155 Phe          | 155 Tyr          | 147 Phe          | 143 Tyr         | 159 Tyr        |
| 188 Val                                | 190 Val          | 190 Val          | 182 Met          | 178 Met         | 194 Ile        |
| 231 Phe                                | 233 Phe          | 233 Phe          | 200 Leu          | 216 Leu         | 240 Leu        |
| 249 Val                                | 251 Ile          | 251 Val          | 239 Val          | 235 Ile         | 259 Val        |

**Supplementary Table S4. Inhibition concentrations of small compounds against several enteroviruses**

| Inhibition concentration (ug/ml) | CV-A10/S0148b | CV-A10/Kowalik | CV-A10/S0273b | EV-A71/G082 | CV-A16/SZ05 | EV-D68/Fermon | EV-D68/VR-1823 |
|----------------------------------|---------------|----------------|---------------|-------------|-------------|---------------|----------------|
| WIN 51711                        | >100          | >100           | >100          | 100         | 12.5        | 50            | <0.78          |
| Pleconaril                       | >100          | >100           | >100          | >100        | 50          | 1.56          | 12.5           |
| Pirodavir                        | >100          | >100           | >100          | 6.25        | 25          | 25            | 6.25           |

\*The highest and lowest concentration of drug used in this experiment are 100 ug/ml and 0.78 ug/ml, respectively.

**Supplementary Table S5. Docking scores of active compounds acquired by Glide 6.9 in SP mode**

| <b>Virus</b>        | <b>Compound</b>     | <b>Docking Score (kcal/mol)</b> |
|---------------------|---------------------|---------------------------------|
| CV-A10              | ICA16               | -8.98                           |
| CV-A10              | ICA17               | -10.91                          |
| CV-A10              | ICA25               | -8.54                           |
| CV-A10              | ICA135              | -8.88                           |
| CV-A10              | Pocket factor (SPH) | -7.84*                          |
| EV-A71 (3VBF)       | ICA135              | -8.09                           |
| EV-A71 (3VBF)       | Pocket factor (SPH) | -7.53*                          |
| CV-A16 (5C4W)       | ICA135              | -8.00                           |
| CV-A16 (5C4W)       | Pocket factor (SPH) | -7.70*                          |
| EV-D68 (4WM8)       | ICA135              | -10.819                         |
| EV-D68 (4WM8)       | Pirodavir (4WM7)    | -10.138*                        |
| CV-B3 (1COV)        | PLM (1COV)          | -6.612*                         |
| CV-B3 (1COV)        | ICA135              | -11.416                         |
| Poliovirus 1 (1VBD) | J78                 | -9.066*                         |
| Poliovirus 1 (1VBD) | ICA135              | -9.466                          |

\* -7.84 kcal/mol was obtained by re-docking the pocket factor into the structure of CV-A10.

\* -7.53 kcal/mol was obtained by re-docking the pocket factor into the structure of EV-A71 (3VBF).

\* -7.70 kcal/mol was obtained by re-docking the pocket factor into the structure of CV-A16 (5C4W).

\* -10.138 kcal/mol was obtained by re-docking Pirodavir into the structure of EV-D68 (4WM7).

\* -6.612 kcal/mol was obtained by re-docking the pocket factor into the structure of CV-B3 (1COV).

\* -9.066 kcal/mol was obtained by re-docking the pocket factor into the structure of Poliovirus 1 (1VBD).

**Supplementary Table S6. Primers for qPCR analysis**

| <b>Primers</b>      | <b>Virus target</b> | <b>Sequence</b>                 |
|---------------------|---------------------|---------------------------------|
| CV-A10-RT-F         | CV-A10              | 5'-GGGCTTTGTCCAACCTCCGCA-3'     |
| CV-A10-RT-R         | CV-A10              | 5'-CGGACGAGCCTCTCCACTCT-3'      |
| CV-A16-RT-F         | CV-A16              | 5'-ATCCAGTAAGGATCCCAGACT-3'     |
| CV-A16-RT-R         | CV-A16              | 5'-GATTTGCATAGTGGAGAGCAG-3'     |
| EV-A71-RT-F         | EV-A71              | 5'-AGTTGTGCAAGGATGCTAGT-3'      |
| EV-A71-RT-R         | EV-A71              | 5'-CTCGTCACTAGCATTGATG-3'       |
| CV-B3-RT-F          | CV-B3               | 5'-AGACCAGGCTGAATGCTA-3'        |
| CV-B3-RT-R          | CV-B3               | 5'-ATCCGCACTCCTCTACTG-3'        |
| PV1-RT-F            | PV1                 | 5'-GGTTTTGTGTCAGCGTGAATGA-3'    |
| PV1-RT-R            | PV1                 | 5'-AAGAGGTCTCTATTCCACAT-3'      |
| EV-D68-RT-F         | EV-D68              | 5'-CGAGAGCATCATCAAAACAGCGACC-3' |
| EV-D68-RT-R         | EV-D68              | 5'-CACTGTGCGAGTTTGTATGGCTTCT-3' |
| $\beta$ -actin-RT-F | $\beta$ -actin      | 5'-GGACTTCGAGCAAGAGATGG-3'      |
| $\beta$ -actin-RT-R | $\beta$ -actin      | 5'-AGCACTGTGTTGGCGTACAG-3'      |
